# Supplementary material
Source: publisher site journal article supplement (http://www.spandidos-publications.com/5972/downloadSupplementary)

Figure S1. Generation of a rat pulpitis model. (A) A model of pulpitis was constructed by making holes in the upper molars of rats under inhalation anesthesia while viewing under a microscope. (B) After 24 h, the sample was collected and micro-CT was used to confirm whether the cut hole had reached the pulp. Arrowheads indicate treated teeth in the micro-CT image. micro-CT, micro computed tomography.

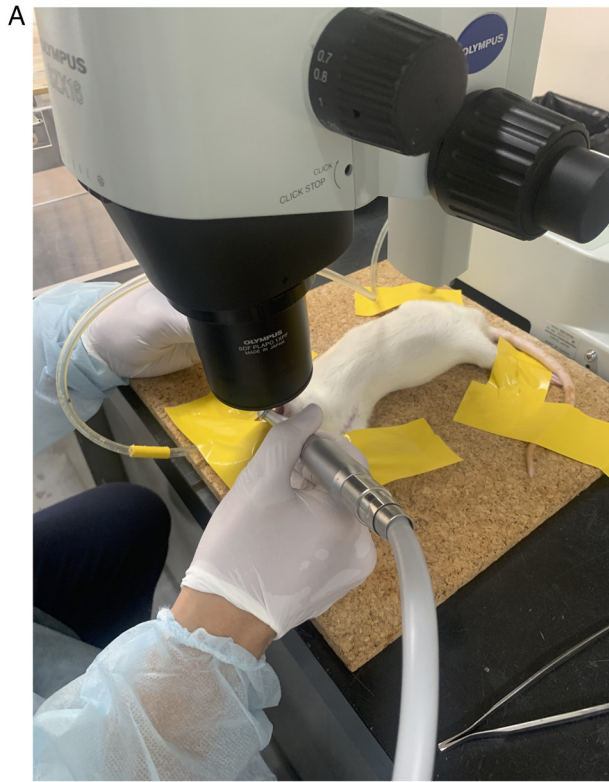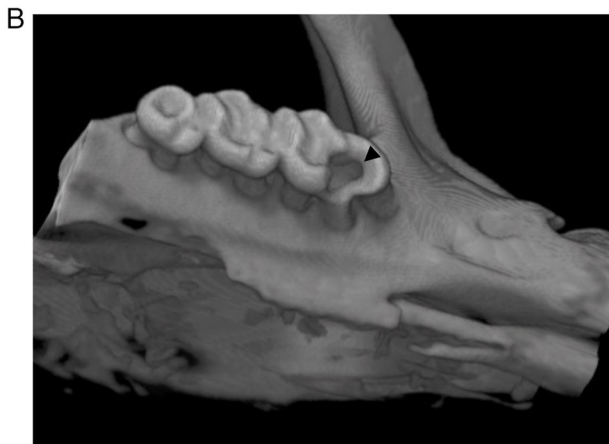

Supplement: Supplementary file 1 [file downloadSupplementary]
